# Supplementary material for: Mapping of EU Support for High Nature Value Farmlands, from the Perspective of Natural and Landscape Regions
Source: MDPI journal article supplement (doi:10.3390/agriculture11090864), 2021-09-10
Supplement: s1 [file s1]

Archive with 1 entries (1 files):
- agriculture-1323582-supplementary.pdf
