# Supplementary figures and images for: Mapping of EU Support for High Nature Value Farmlands, from the Perspective of Natural and Landscape Regions
Source: MDPI journal article supplement (doi:10.3390/agriculture11090864), 2021-09-10

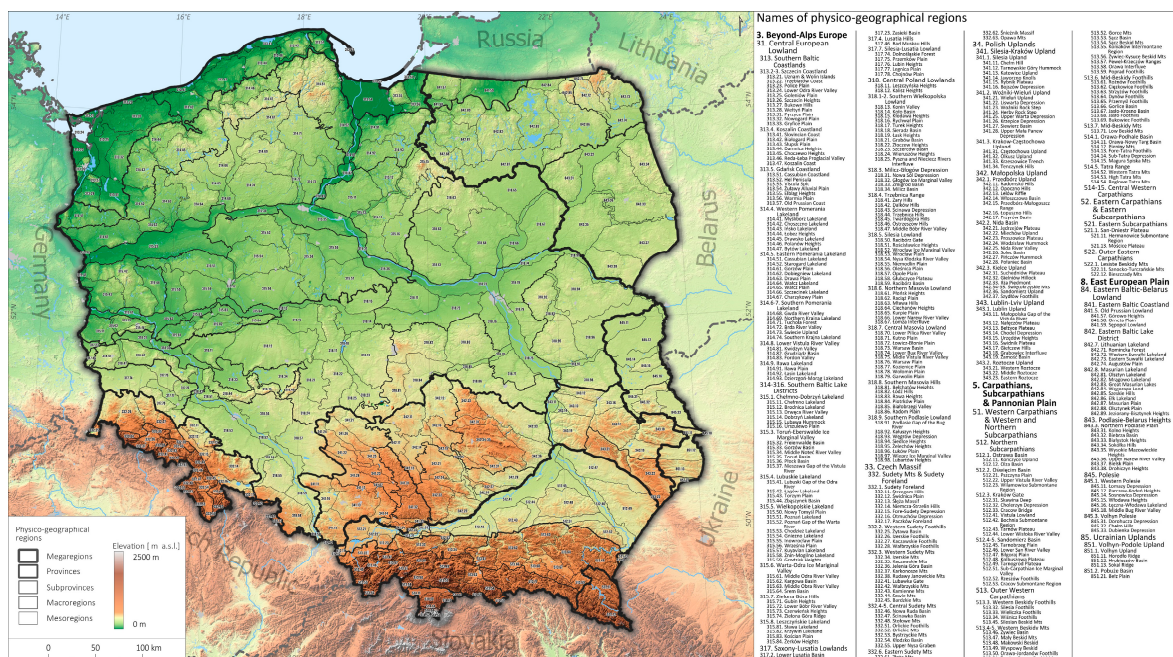

Supplement: s1 [file s1 › agriculture-1323582-supplementary.pdf]
